# Supplementary material for: Benzimidazolylquinoxalines: novel fluorophores with tuneable sensitivity to solvent effects
Source: Royal Society of Chemistry journal article supplement (doi:10.1039/c6cp06658e), 2017-01-01
Supplement: c6cp06658e1.pdf [file c6cp06658e1.pdf]

## Supporting information

### **Benzimidazolequinoxalines: Novel Fluorophores with Tuneable Sensitivity to Solvent Effects**

Timur I. Burganov,<sup>a</sup> Nataliya A. Zhukova,<sup>a</sup> Vakhid A. Mamedov,<sup>a</sup> Christoph Bannwarth,<sup>b</sup> Stefan Grimme,<sup>b</sup> and Sergey A. Katsyuba\*<sup>a</sup>

<sup>a</sup> *A. E. Arbuzov Institute of Organic and Physical Chemistry, Kazan Scientific Centre of the Russian Academy of Sciences, Arbuzov str. 8, 420088 Kazan, Russia*

<sup>b</sup> *Mulliken Center for Theoretical Chemistry, Institut für Physikalische und Theoretische Chemie der Universität Bonn, Berlingstr. 4, 53115 Bonn, Germany*

#### **Contents:**

**Figure 1S.** The computed geometries of the *syn*- and *anti*-conformers of **1**, **4** and **6** in the ground state and in the excited state

**Figure 2S.** Absorption spectra of **2**.

**Table 1S.** Structural parameters of intra- and intermolecular H-bonds or short contacts of **1**, **2**, **4**, **6** in ground ( $S_0$ ) and excited ( $S_1$ ) states.

**Table 2S.** Experimental wavelengths of emission and the lowest-energy absorption maxima as compared with the corresponding wavelengths calculated for *syn*- and *anti*-conformers.

**Table 3S.** Calculated dipole moments for  $S_0$  and  $S_1$  states of both *syn* and *anti* conformers..

**Figure 1S.** The computed geometries of the *syn*- and *anti*-conformers of **1**, **4** and **6** in the ground state and in the excited state. Distances – in Å;  $\varphi$  - dihedral angles between the benzimidazole (B), quinoxaline (Q) and phenyl (Ph) rings.

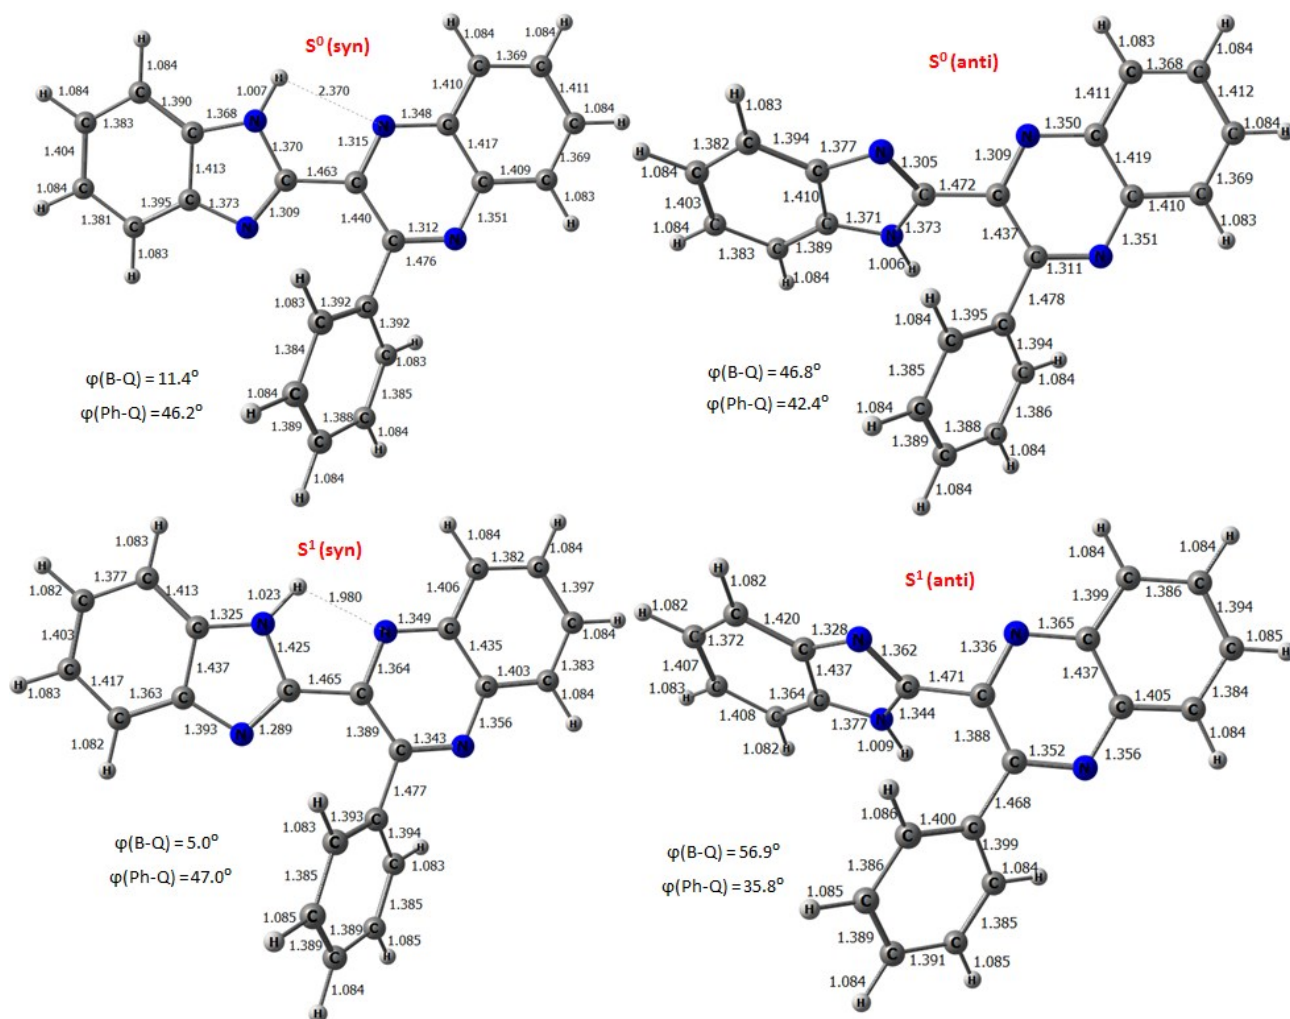

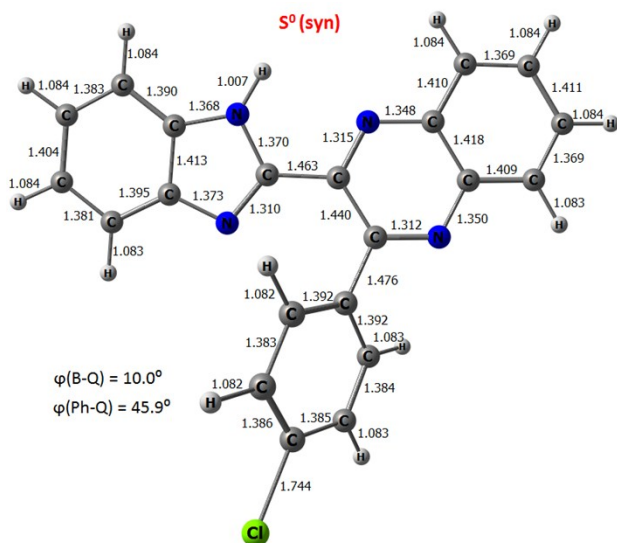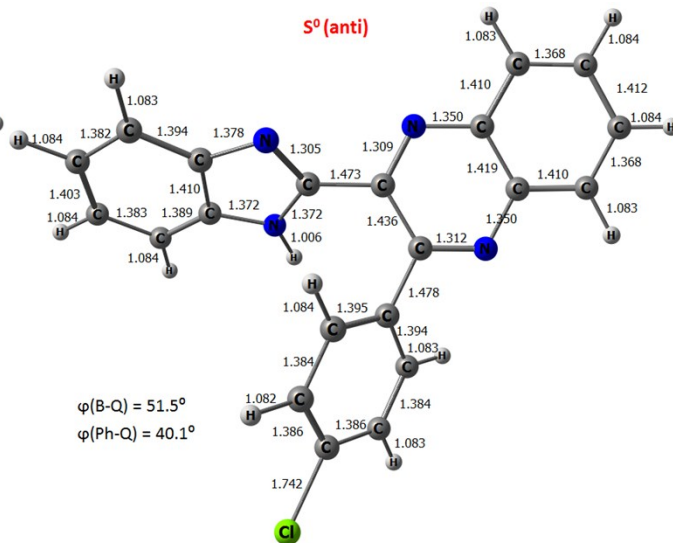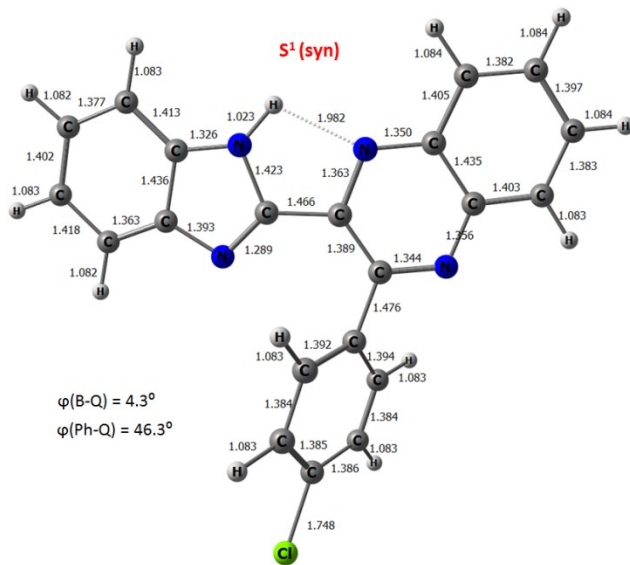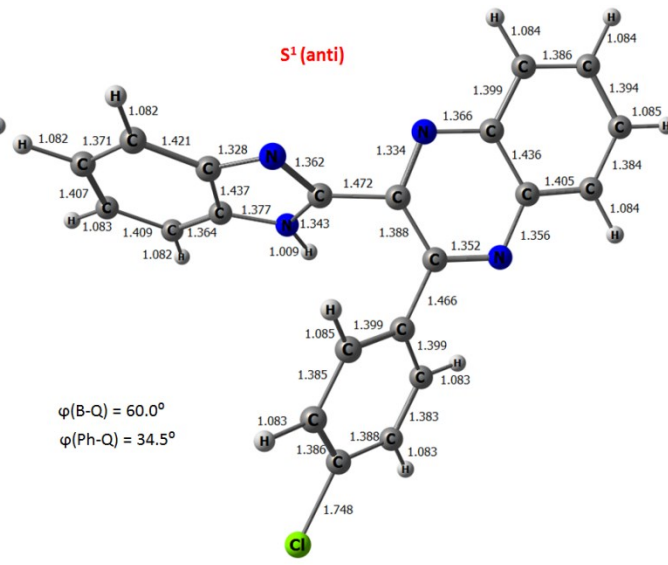

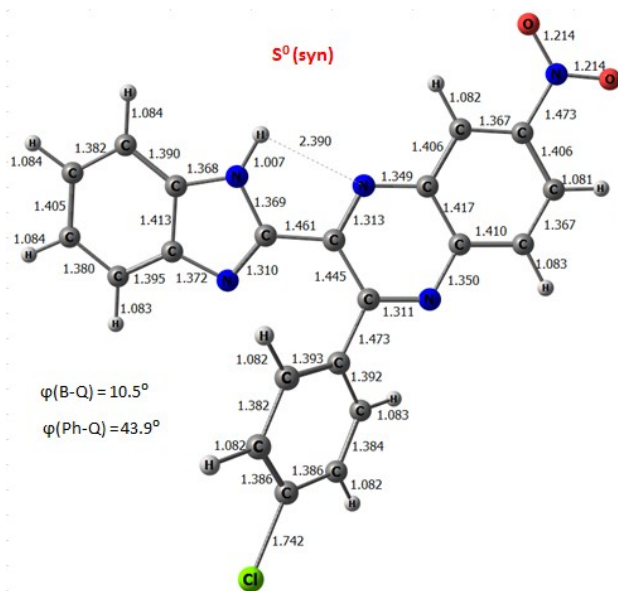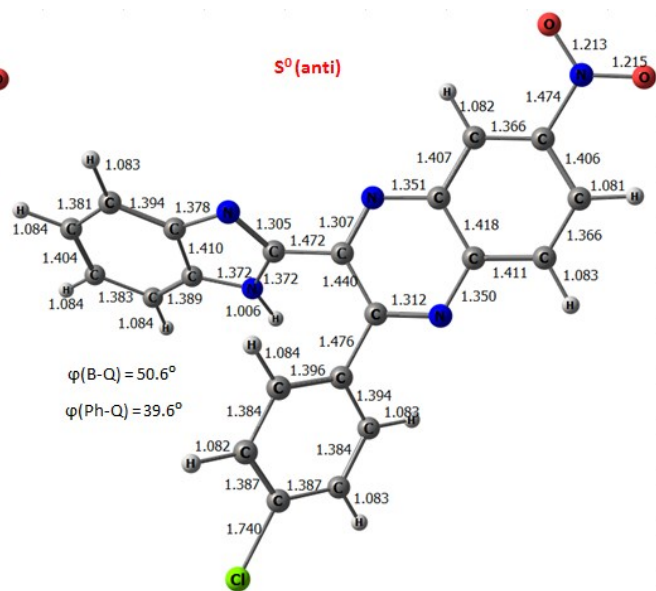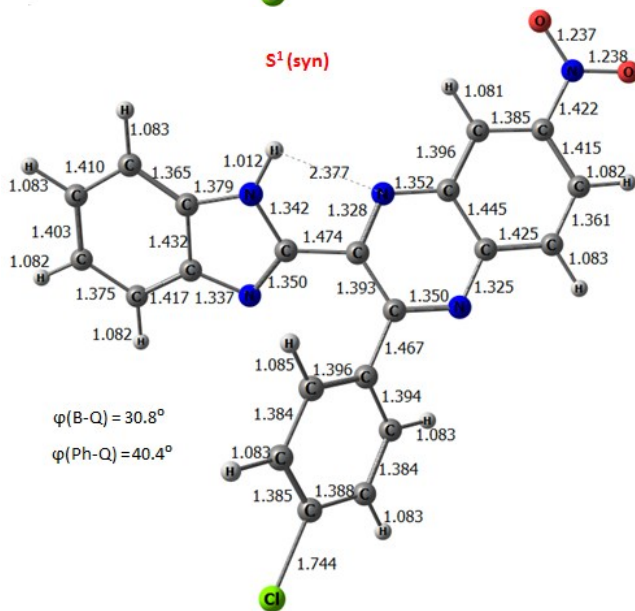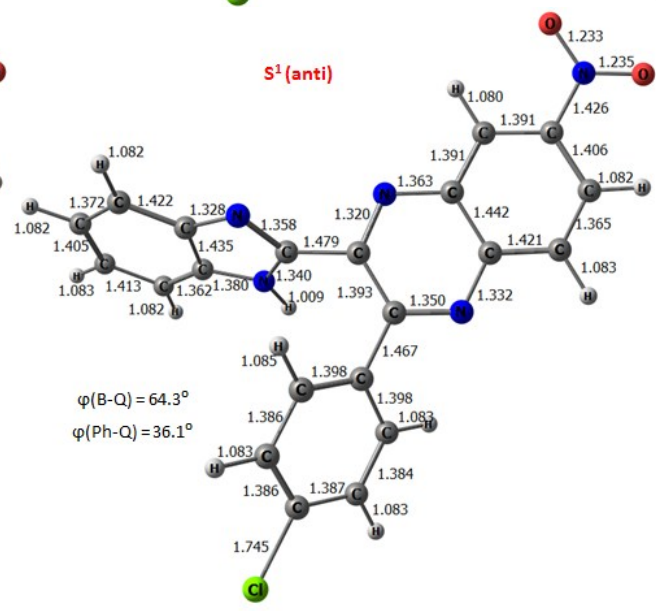

**Figure 2S.** TDDFT simulated absorption spectra of *syn*- (red lines) and *anti*-conformers (blue lines) of **2** in comparison with the experimental spectrum registered for **2** solutions in DCE (black line) and DMF (green line). The heights of the vertical straight lines correspond to the calculated oscillator strengths of the corresponding vertical transitions. Red and blue envelope curves are obtained by broadening of the vertical straight lines by Gaussian functions with a full-width at 1/e height of 0.4 eV.

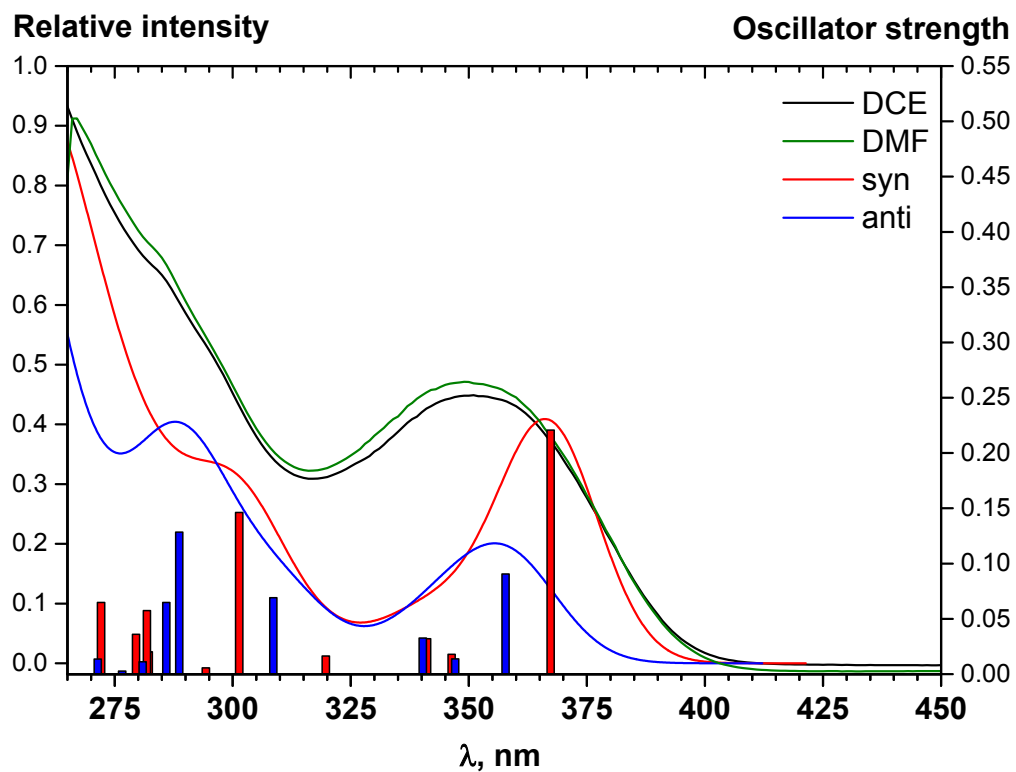

**Table 1S.** Structural parameters of intra- and intermolecular H-bonds or short contacts of **1**, **4**, **6** in ground ( $S_0$ ) and excited ( $S_1$ ) states. All bond lengths and their changes are given in Å.

| Compound                                                                                        | Conformer                                                                                     | Bond length  | 1:1 H-complex with DMSO <sup>a</sup>   |        | isolated molecules <sup>b</sup> |                     |        |
|-------------------------------------------------------------------------------------------------|-----------------------------------------------------------------------------------------------|--------------|----------------------------------------|--------|---------------------------------|---------------------|--------|
|                                                                                                 |                                                                                               |              | State                                  |        | State                           |                     |        |
|                                                                                                 |                                                                                               |              | $S_0$                                  | $S_1$  | $S_0$                           | $S_1$               |        |
| 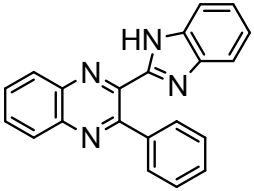<br><b>1</b>   | <i>syn</i>                                                                                    | NH           | 1.0282                                 | 1.0746 | 1.0072                          | 1.0234              |        |
|                                                                                                 |                                                                                               | $\Delta$ NH  | 0.0211                                 | 0.0512 |                                 |                     |        |
|                                                                                                 |                                                                                               | H $\cdots$ O | 1.7649                                 | 1.5230 |                                 |                     |        |
|                                                                                                 |                                                                                               | SO           | 1.5292                                 | 1.5528 |                                 |                     |        |
|                                                                                                 | <i>anti</i>                                                                                   | NH           | 1.0291                                 | 1.0845 | 1.0059                          | 1.0091              |        |
|                                                                                                 |                                                                                               | $\Delta$ NH  | 0.0232                                 | 0.0754 |                                 |                     |        |
|                                                                                                 |                                                                                               | H $\cdots$ O | 1.7340                                 | 1.4996 |                                 |                     |        |
|                                                                                                 |                                                                                               | SO           | 1.5303                                 | 1.5540 |                                 |                     |        |
|                                                                                                 |                                                                                               |              | $\Delta$ NH <sub><i>syn-anti</i></sub> | -      | -                               | 0.0012 <sup>c</sup> | 0.0143 |
|                                                                                                 | <br><b>4</b> | <i>syn</i>   | NH                                     | 1.0285 | 1.0752                          | 1.0072              | 1.0235 |
| $\Delta$ NH                                                                                     |                                                                                               |              | 0.0213                                 | 0.0517 |                                 |                     |        |
| H $\cdots$ O                                                                                    |                                                                                               |              | 1.7626                                 | 1.5203 |                                 |                     |        |
| SO                                                                                              |                                                                                               |              | 1.5293                                 | 1.5528 |                                 |                     |        |
| <i>anti</i>                                                                                     |                                                                                               | NH           | 1.0285                                 | 1.0850 | 1.0057                          | 1.0089              |        |
|                                                                                                 |                                                                                               | $\Delta$ NH  | 0.0228                                 | 0.0762 |                                 |                     |        |
|                                                                                                 |                                                                                               | H $\cdots$ O | 1.7415                                 | 1.4963 |                                 |                     |        |
|                                                                                                 |                                                                                               | SO           | 1.5303                                 | 1.5539 |                                 |                     |        |
|                                                                                                 |                                                                                               |              | $\Delta$ NH <sub><i>syn-anti</i></sub> | -      | -                               | 0.0015 <sup>e</sup> | 0.0146 |
| <br><b>6</b> |                                                                                               | <i>syn</i>   | NH                                     | 1.0310 | 1.0849                          | 1.0072              | 1.0120 |
|                                                                                                 | $\Delta$ NH                                                                                   |              | 0.0238                                 | 0.0730 |                                 |                     |        |
|                                                                                                 | H $\cdots$ O                                                                                  |              | 1.7380                                 | 1.4881 |                                 |                     |        |
|                                                                                                 | SO                                                                                            |              | 1.5303                                 | 1.5539 |                                 |                     |        |
|                                                                                                 | <i>anti</i>                                                                                   | NH           | 1.0228                                 | 1.0871 | 1.0058                          | 1.0089              |        |
|                                                                                                 |                                                                                               | $\Delta$ NH  | 0.0171                                 | 0.0783 |                                 |                     |        |
|                                                                                                 |                                                                                               | H $\cdots$ O | 1.8170                                 | 1.4832 |                                 |                     |        |
|                                                                                                 |                                                                                               | SO           | 1.5307                                 | 1.5531 |                                 |                     |        |
|                                                                                                 |                                                                                               |              | $\Delta$ NH <sub><i>syn-anti</i></sub> | -      | -                               | 0.0014 <sup>f</sup> | 0.0031 |

<sup>a</sup>Strength of intermolecular H-bond N–H $\cdots$ O=S in 1:1 H-complex with DMSO is characterized by: i) elongation of N–H bond in the H-complex relative to isolated benzimidazolequinoxaline molecule,  $\Delta$ NH; ii) H $\cdots$ O bond length; iii) S=O bond length. Increase in the H-bond strength results in increase of  $\Delta$ NH and S=O bond length, and simultaneously in decrease of H $\cdots$ O bond length.

<sup>b</sup>Relative strength of intramolecular N–H $\cdots$ N interaction is characterized by elongation of N–H bond of *syn*-conformer relative to *anti*-conformer,  $\Delta$ NH<sub>*syn-anti*</sub>. <sup>c</sup>Relative change of frequency of stretching vibrations  $\Delta\nu$ NH<sub>*syn-anti*</sub> = -10 cm<sup>-1</sup>; the corresponding change of IR intensity  $\Delta I(\nu$ NH)<sub>*syn-anti*</sub> = 21 km·mol<sup>-1</sup>. <sup>d</sup> $\Delta\nu$ NH<sub>*syn-anti*</sub> = -14 cm<sup>-1</sup>;  $\Delta I(\nu$ NH)<sub>*syn-anti*</sub> = 25 km·mol<sup>-1</sup>. <sup>e</sup> $\Delta\nu$ NH<sub>*syn-anti*</sub> = -14 cm<sup>-1</sup>;  $\Delta I(\nu$ NH)<sub>*syn-anti*</sub> = 24 km·mol<sup>-1</sup>. <sup>f</sup> $\Delta\nu$ NH<sub>*syn-anti*</sub> = -13 cm<sup>-1</sup>;  $\Delta I(\nu$ NH)<sub>*syn-anti*</sub> = 23 km·mol<sup>-1</sup>.

**Table 2S.** Experimental wavelengths (nm) of emission (emi) and the lowest-energy absorption (abs) maxima as compared with the corresponding wavelengths calculated for *syn*- and *anti*-conformers.

| Compound                                                                                        | Type | Experiment   |              |               | Calculations |             |
|-------------------------------------------------------------------------------------------------|------|--------------|--------------|---------------|--------------|-------------|
|                                                                                                 |      | DCE solution | DMF solution | DMSO solution | <i>syn</i>   | <i>anti</i> |
| 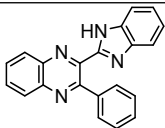<br><b>1</b>   | abs  | 373          | 367          | 367           | 368          | 355         |
|                                                                                                 | emi  | 440          | 460          | 470           | 438          | 448         |
| <br><b>2</b>   | abs  | 352          | 352          | 352           | 367          | 359         |
|                                                                                                 | emi  | 446          | 465          | 470           | 467          | 473         |
| <br><b>3</b>   | abs  | 375          | 370          | 370           | 373          | 355         |
|                                                                                                 | emi  | 444          | 462          | 468           | 440          | 450         |
| <br><b>4</b>  | abs  | 375          | 371          | 371           | 373          | 358         |
|                                                                                                 | emi  | 446          | 468          | 470           | 442          | 454         |
| <br><b>5</b> | abs  | 383          | 383          | 380           | 382          | 377         |
|                                                                                                 | emi  | 473          | 492          | 501           | 466          | 483         |
| <br><b>6</b> | abs  | 396          | 391          | 391           | 412          | 406         |
|                                                                                                 | emi  | 519          | --           | --            | 513          | 551         |

**Table 3S.** Calculated dipole moments (D) for S<sub>0</sub> and S<sub>1</sub> states of both *syn* and *anti* conformers.

| Compound                                                                                        | conformer   | Calculated dipole moments |                |
|-------------------------------------------------------------------------------------------------|-------------|---------------------------|----------------|
|                                                                                                 |             | S <sub>0</sub>            | S <sub>1</sub> |
| 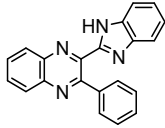<br><b>1</b>   | <i>syn</i>  | 2.80                      | 12.04          |
|                                                                                                 | <i>anti</i> | 3.37                      | 14.23          |
| <br><b>2</b>   | <i>syn</i>  | 3.15                      | 14.25          |
|                                                                                                 | <i>anti</i> | 3.73                      | 15.18          |
| <br><b>3</b>   | <i>syn</i>  | 4.45                      | 12.23          |
|                                                                                                 | <i>anti</i> | 2.97                      | 14.23          |
| <br><b>4</b>  | <i>syn</i>  | 4.80                      | 12.51          |
|                                                                                                 | <i>anti</i> | 2.97                      | 13.78          |
| <br><b>5</b> | <i>syn</i>  | 2.79                      | 14.56          |
|                                                                                                 | <i>anti</i> | 3.17                      | 17.81          |
| <br><b>6</b> | <i>syn</i>  | 2.43                      | 18.49          |
|                                                                                                 | <i>anti</i> | 6.12                      | 21.97          |
